# Supplementary material for: Clinical Applications of Artificial Intelligence and Machine Learning in Children with Cleft Lip and Palate—A Systematic Review
Source: MDPI journal article supplement (doi:10.3390/ijerph191710860), 2022-08-31
Supplement: s1 [file s1]

| Disease status (reference standard result) |                         |                         |                      |
|--------------------------------------------|-------------------------|-------------------------|----------------------|
| Test outcome (index test)                  | Diseased (D+)           | Non-diseased (D-)       | Total                |
| Index test positive (T+)                   | True positives (a)      | False positives (b)     | Test positives (a+b) |
| Index test negative (T-)                   | False negatives (c)     | True negatives (d)      | Test negatives (c+d) |
| Total                                      | Disease positives (a+c) | Disease negatives (b+d) | N (a+b+c+d)          |

| Author                       | Target condition       | Testing sample size (N) | Reference standard |     |     |     | Accuracy (%)            |
|------------------------------|------------------------|-------------------------|--------------------|-----|-----|-----|-------------------------|
|                              |                        |                         | TP                 | FP  | FN  | TN  |                         |
| Zhang et al., 2018           | Genetic risk           | 1587                    | 504                | 205 | 382 | 496 | 92.6                    |
| Machado et al., 2021         |                        | 2266                    | 722                | 207 | 515 | 822 | 94.5                    |
| Alam et al., 2021            | Sagittal relationship  | 154                     | 92                 | 31  | 0   | 31  | 94.5                    |
| Alam and Alfawzan            | Dental characteristics | 154                     | 92                 | 31  | 0   | 31  | 95.6                    |
| Golabbakhsh et al. 2017      | Hypernasality          | 45                      | 15                 | 15  | 0   | 15  | 85                      |
| Orozco Arroyave et al., 2012 |                        | 706                     | 130                | 429 | 39  | 108 | German 88<br>Spanish 95 |
| Wang et al., 2019            |                        | 223                     | 62                 | 48  | 48  | 65  | 93.34                   |
